# Supplementary material
Source: ML conference proceedings conference paper supplement (https://proceedings.mlr.press/v32/silver14.html)
Supplement: Supplementary file 1 [file silver14-supp.pdf]

---

## Deterministic Policy Gradient Algorithms: Supplementary Material

---

### A. Regularity Conditions

Within the text we have referred to regularity conditions on the MDP:

**Regularity conditions A.1:**  $p(s'|s, a)$ ,  $\nabla_a p(s'|s, a)$ ,  $\mu_\theta(s)$ ,  $\nabla_\theta \mu_\theta(s)$ ,  $r(s, a)$ ,  $\nabla_a r(s, a)$ ,  $p_1(s)$  are continuous in all parameters and variables  $s$ ,  $a$ ,  $s'$  and  $x$ .

**Regularity conditions A.2:** there exists a  $b$  and  $L$  such that  $\sup_s p_1(s) < b$ ,  $\sup_{a, s, s'} p(s'|s, a) < b$ ,  $\sup_{a, s} r(s, a) < b$ ,  $\sup_{a, s, s'} \|\nabla_a p(s'|s, a)\| < L$ , and  $\sup_{a, s} \|\nabla_a r(s, a)\| < L$ .

### B. Proof of Theorem 1

*proof of Theorem 1.* The proof follows along the same lines of the standard stochastic policy gradient theorem in Sutton et al. (1999). Note that the regularity conditions A.1 imply that  $V^{\mu_\theta}(s)$  and  $\nabla_\theta V^{\mu_\theta}(s)$  are continuous functions of  $\theta$  and  $s$  and the compactness of  $\mathcal{S}$  further implies that for any  $\theta$ ,  $\|\nabla_\theta V^{\mu_\theta}(s)\|$ ,  $\|\nabla_a Q^{\mu_\theta}(s, a)|_{a=\mu_\theta(s)}\|$  and  $\|\nabla_\theta \mu_\theta(s)\|$  are bounded functions of  $s$ . These conditions will be necessary to exchange derivatives and integrals, and the order of integration whenever necessary in the following proof. We have,

$$\begin{aligned}
\nabla_\theta V^{\mu_\theta}(s) &= \nabla_\theta Q^{\mu_\theta}(s, \mu_\theta(s)) \\
&= \nabla_\theta \left( r(s, \mu_\theta(s)) + \int_{\mathcal{S}} \gamma p(s'|s, \mu_\theta(s)) V^{\mu_\theta}(s') ds' \right) \\
&= \nabla_\theta \mu_\theta(s) \nabla_a r(s, a)|_{a=\mu_\theta(s)} + \nabla_\theta \int_{\mathcal{S}} \gamma p(s'|s, \mu_\theta(s)) V^{\mu_\theta}(s') ds' \\
&= \nabla_\theta \mu_\theta(s) \nabla_a r(s, a)|_{a=\mu_\theta(s)} \\
&\quad + \int_{\mathcal{S}} \gamma \left( p(s'|s, \mu_\theta(s)) \nabla_\theta V^{\mu_\theta}(s') + \nabla_\theta \mu_\theta(s) \nabla_a p(s'|s, a)|_{a=\mu_\theta(s)} V^{\mu_\theta}(s') \right) ds' \tag{1} \\
&= \nabla_\theta \mu_\theta(s) \nabla_a \left( r(s, a) + \int_{\mathcal{S}} \gamma p(s'|s, a) V^{\mu_\theta}(s') ds' \right) \Big|_{a=\mu_\theta(s)} \\
&\quad + \int_{\mathcal{S}} \gamma p(s'|s, \mu_\theta(s)) \nabla_\theta V^{\mu_\theta}(s') ds' \\
&= \nabla_\theta \mu_\theta(s) \nabla_a Q^{\mu_\theta}(s, a)|_{a=\mu_\theta(s)} + \int_{\mathcal{S}} \gamma p(s \rightarrow s', 1, \mu_\theta) \nabla_\theta V^{\mu_\theta}(s') ds'.
\end{aligned}$$

Where in (1) we used the Leibniz integral rule to exchange order of derivative and integration, requiring the regularity conditions, specifically continuity of  $p(s'|s, a)$ ,  $\mu_\theta(s)$ ,  $V^{\mu_\theta}(s)$  and their derivatives w.r.t.  $\theta$ . And now iterating this formula

we have,

$$\begin{aligned}
 &= \nabla_{\theta} \mu_{\theta}(s) \nabla_a Q^{\mu_{\theta}}(s, a)|_{a=\mu_{\theta}(s)} \\
 &\quad + \int_{\mathcal{S}} \gamma p(s \rightarrow s', 1, \mu_{\theta}) \nabla_{\theta} \mu_{\theta}(s') \nabla_a Q^{\mu_{\theta}}(s', a)|_{a=\mu_{\theta}(s')} ds' \\
 &\quad + \int_{\mathcal{S}} \gamma p(s \rightarrow s', 1, \mu_{\theta}) \int_{\mathcal{S}} \gamma p(s' \rightarrow s'', 1, \mu_{\theta}) \nabla_{\theta} V^{\mu_{\theta}}(s'') ds'' ds' \\
 &= \nabla_{\theta} \mu_{\theta}(s) \nabla_a Q^{\mu_{\theta}}(s, a)|_{a=\mu_{\theta}(s)} \\
 &\quad + \int_{\mathcal{S}} \gamma p(s \rightarrow s', 1, \mu_{\theta}) \nabla_{\theta} \mu_{\theta}(s') \nabla_a Q^{\mu_{\theta}}(s', a)|_{a=\mu_{\theta}(s')} ds' \\
 &\quad + \int_{\mathcal{S}} \gamma^2 p(s \rightarrow s', 2, \mu_{\theta}) \nabla_{\theta} V^{\mu_{\theta}}(s') ds' \\
 &\quad \vdots \\
 &= \int_{\mathcal{S}} \sum_{t=0}^{\infty} \gamma^t p(s \rightarrow s', t, \mu_{\theta}) \nabla_{\theta} \mu_{\theta}(s') \nabla_a Q^{\mu_{\theta}}(s', a)|_{a=\mu_{\theta}(s')} ds'.
 \end{aligned} \tag{2}$$

Where in 2 we have used Fubini's theorem to exchange the order of integration, requiring the regularity conditions so that  $\|\nabla_{\theta} V^{\mu_{\theta}}(s)\|$  is bounded. Now taking the expectation over  $S_1$  we have,

$$\begin{aligned}
 \nabla_{\theta} J(\mu_{\theta}) &= \nabla_{\theta} \int_{\mathcal{S}} p_1(s) V^{\mu_{\theta}}(s) ds \\
 &= \int_{\mathcal{S}} p_1(s) \nabla_{\theta} V^{\mu_{\theta}}(s) ds \\
 &= \int_{\mathcal{S}} \int_{\mathcal{S}} \sum_{t=0}^{\infty} \gamma^t p_1(s) p(s \rightarrow s', t, \mu_{\theta}) \nabla_{\theta} \mu_{\theta}(s') \nabla_a Q^{\mu_{\theta}}(s', a)|_{a=\mu_{\theta}(s')} ds' ds \\
 &= \int_{\mathcal{S}} \rho^{\mu_{\theta}}(s) \nabla_{\theta} \mu_{\theta}(s) \nabla_a Q^{\mu_{\theta}}(s, a)|_{a=\mu_{\theta}(s)} ds,
 \end{aligned} \tag{3}$$

where in (3) we used the Leibniz integral rule to exchange derivative and integral, requiring the regularity conditions, specifically so that  $p_1(s)$  and  $V^{\mu_{\theta}}(s)$  and derivatives w.r.t.  $\theta$  are continuous. In the final line we again used Fubini's theorem to exchange the order of integration, requiring the boundedness of the integrand as implied by the regularity conditions.  $\square$

## C. Proof of Theorem 2

We first restate Theorem 2 in detail, with discussion, and then prove the theorem. We first make a preliminary definition:

**Conditions B1:** Functions  $\nu_{\sigma}$  parametrized by  $\sigma$  are said to be a *regular delta-approximation* on  $\mathcal{R} \subseteq \mathcal{A}$  if they satisfy the following conditions:

1. The distributions  $\nu_{\sigma}$  converge to a delta distribution:  $\lim_{\sigma \downarrow 0} \int_{\mathcal{A}} \nu_{\sigma}(a', a) f(a) da = f(a')$  for  $a' \in \mathcal{R}$  and suitably smooth  $f$ . Specifically we require that this convergence is uniform in  $a'$  and over any class  $\mathcal{F}$  of  $L$ -Lipschitz and bounded functions,  $\|\nabla_a f(a)\| < L < \infty$ ,  $\sup_a f(a) < b < \infty$ , i.e.:

$$\lim_{\sigma \downarrow 0} \sup_{f \in \mathcal{F}, a' \in \mathcal{A}} \left| \int_{\mathcal{A}} \nu_{\sigma}(a', a) f(a) da - f(a') \right| = 0$$

2. For each  $a' \in \mathcal{R}$ ,  $\nu_{\sigma}(a', \cdot)$  is supported on some compact  $\mathcal{C}_{a'} \subseteq \mathcal{A}$  with Lipschitz boundary  $\text{bd}(\mathcal{C}_{a'})$ , vanishes on the boundary and is continuously differentiable on  $\mathcal{C}_{a'}$ .
3. For each  $a' \in \mathcal{R}$ , for each  $a \in \mathcal{A}$ , the gradient  $\nabla_{a'} \nu_{\sigma}(a', a)$  exists.
4. Translation invariance: For all  $a \in \mathcal{A}$ ,  $a' \in \mathcal{R}$ , and any  $\delta \in \mathbb{R}^n$  such that  $a + \delta \in \mathcal{A}$ ,  $a' + \delta \in \mathcal{A}$ ,  $\nu(a', a) = \nu(a' + \delta, a + \delta)$ .

We restate the theorem:

**Theorem.** Let  $\mu_\theta : \mathcal{S} \rightarrow \mathcal{A}$ . Denote the range of  $\mu_\theta$  by  $\mathcal{R}_\theta := \text{range}(\mu_\theta) \subseteq \mathcal{A}$ , and  $\mathcal{R} = \cup_\theta \mathcal{R}_\theta$ . For each  $\theta$ , Consider a stochastic policy  $\pi_{\mu_\theta, \sigma}$  such that  $\pi_{\mu_\theta, \sigma}(a|s) = \nu_\sigma(\mu_\theta(s), a)$ , where  $\nu_\sigma$  satisfy Conditions B1 on  $\mathcal{R}$  above. Suppose further that the ‘‘regularity conditions’’ A.1 and A.2 (see Section A) on the MDP hold. Then,

$$\lim_{\sigma \downarrow 0} \nabla_\theta J(\pi_{\mu_\theta, \sigma}) = \nabla_\theta J(\mu_\theta) \quad (4)$$

where on the l.h.s. the gradient is the standard stochastic policy gradient and on the r.h.s. the gradient is the deterministic policy gradient.

Theorem 2 holds for a very wide class of policies when  $\mathcal{A} = \mathbb{R}^n$ : any continuously differentiable, compactly supported  $\xi : \mathbb{R}^n \rightarrow \mathbb{R}$  with total integral 1, can be used to construct  $\nu_\sigma(a, a') = 1/\sigma^n \xi((a' - a)/\sigma)$  which satisfies our conditions, and the space of such functions is large: given any compact support such a function can be constructed. It is easy to check that any  $\nu_\sigma(a, a')$  constructed on compact support with Lipschitz boundary in this way will satisfy Conditions B1.

A simple example is any ‘‘bump function’’ such as, in 1 dimension,  $\xi(a) = \begin{cases} e^{-\frac{1}{1-|a|^2}} & |a| < 1 \\ 0 & |a| \geq 1 \end{cases}$ , or multidimensional versions.

We now prove the theorem. Throughout the proof we denote the time  $t$  marginal density at state  $s$  following policy  $\pi$  by  $p_t^\pi(s)$ . We begin with preliminary lemmas:

**Lemma 1.** Let  $\mathcal{U} \times \mathcal{V} \subseteq \mathbb{R}^n \times \mathbb{R}^n$ . Let  $\nu : \mathcal{U} \times \mathcal{V} \rightarrow \mathbb{R}$  be differentiable on  $\mathcal{U} \times \mathcal{V}$ . Then (A)  $\Leftrightarrow$  (B)  $\Rightarrow$  (C) where,

(A) Translation invariance: For all  $u \in \mathcal{U}$ ,  $v \in \mathcal{V}$ , and any  $\delta \in \mathbb{R}^n$  such that  $u+\delta \in \mathcal{U}$ ,  $v+\delta \in \mathcal{V}$ ,  $\nu(u, v) = \nu(u+\delta, v+\delta)$ .

(B) There exists some function  $\chi : \mathbb{R}^n \rightarrow \mathbb{R}$  such that  $\nu(u, v) = \chi(u - v)$ .

(C)  $\nabla_u \nu(u, v) = -\nabla_v \nu(u, v)$ , wherever the gradients exist.

If furthermore  $\mathcal{U} \times \mathcal{V}$  is convex then  $C \Rightarrow A$ , i.e. all properties are equivalent.

*proof of Lemma 1.* A  $\Rightarrow$  B: For any  $c \in \mathcal{U} - \mathcal{V}$  define  $\chi : \mathbb{R}^n \rightarrow \mathbb{R}$  by  $\chi : c \mapsto \nu(w, w - c)$  for any  $w \in \mathcal{U}$  such that  $c = w - v$  for some  $v \in \mathcal{V}$ . Observe that this defines  $\chi$  uniquely on all of  $\mathcal{U} - \mathcal{V}$ . Thus given any  $u \in \mathcal{U}$ ,  $v \in \mathcal{V}$  we can choose  $w = u$  and we have,

$$\begin{aligned} \chi(u - v) &= \nu(u, u - (u - v)) \\ &= \nu(u, v) \end{aligned}$$

B  $\Rightarrow$  A: Trivial

B  $\Rightarrow$  C: Let  $h(u, v) = u - v$  then by the chain rule  $\nabla_u \nu(u, v) = \nabla_h \chi(h)|_{h(u,v)} \nabla_u h(u, v) = \nabla_h \chi(h)|_{h(u,v)} = -\nabla_h \chi(h)|_{h(u,v)} \nabla_v h(u, v) = -\nabla_v \nu(u, v)$

(C and Convexity)  $\Rightarrow$  A: Suppose  $\mathcal{U} \times \mathcal{V}$  is convex. Consider any  $(u, v) \in \mathcal{U} \times \mathcal{V}$ , and any  $\delta \in \mathbb{R}^n$ , we have

$$\begin{aligned} \langle \nabla_{(u,v)} \nu(u, v), (\delta, \delta) \rangle &= \langle \nabla_u \nu(u, v), \delta \rangle + \langle \nabla_v \nu(u, v), \delta \rangle \\ &= \langle \nabla_u \nu(u, v), \delta \rangle - \langle \nabla_u \nu(u, v), \delta \rangle \\ &= 0 \end{aligned}$$

hence  $\nu$  is constant in the direction  $(\delta, \delta)$ . Since  $(u, v)$  and  $\delta$  were arbitrary,  $\nu$  is constant in the direction  $(\delta, \delta)$  for all  $\delta \in \mathbb{R}^n$ . Now since  $\mathcal{U} \times \mathcal{V}$  is convex, for any  $A = (u, v) \in \mathcal{U} \times \mathcal{V}$  and  $B = (u + \delta, v + \delta) \in \mathcal{U} \times \mathcal{V}$  we have that the straight line connecting  $A$  and  $B$  is entirely contained  $\mathcal{U} \times \mathcal{V}$ . Thus, since  $\nu$  is constant along the path  $\nu(A) = \nu(B)$ .  $\square$

We now note that the regularity conditions and properties of  $\nu$  imply the following lemmas which we will need to prove Theorem 2.

**Lemma 2.** 1. For any stochastic policy  $\pi$  and any  $t$ ,  $\sup_s p_t^\pi(s) < b$  and similarly for deterministic policies.

2. For any stochastic policy  $\pi$ ,  $\sup_s \rho^\pi(s) < b/(1 - \gamma)$  and similarly for deterministic policies.
3. for any stochastic policy  $\pi$ ,  $\sup_{a,s} \{ \|\nabla_a Q^\pi(a, s)\| \} < c < \infty$  and similarly for deterministic policies.

*Proof.* 1. The claim is true for  $t = 1$  by the regularity conditions A.2, then for  $t \geq 1$ ,

$$\begin{aligned} \sup_{s'} p_{t+1}^\pi(s') &= \sup_{s'} \int p_t^\pi(s) \int \pi(a|s) p(s'|s, a) da ds \\ &\leq \sup_{s', a, s} p(s'|s, a) < b \end{aligned}$$

$$2. \sup_s \rho^\pi(s) \leq \sum_{t=1}^{\infty} \gamma^{t-1} \sup_s p_t^\pi(s) \leq b/(1 - \gamma)$$

3. We have that,

$$\begin{aligned} \sup_{s,a} \|\nabla_a Q^\pi(a, s)\| &\leq \sup_{s,a} \|\nabla_a r(s, a)\| + \gamma \sup_{s,a} \int \|\nabla_a p(s'|s, a)\| \|V^\pi(s')\| ds' \\ &\leq L + \gamma \int Lb/(1 - \gamma) ds' \\ &< \infty \end{aligned}$$

where the final line follows since  $\mathcal{S}$  is compact and the integral over  $\mathcal{S}$  is finite. □

**Lemma 3.**  $\lim_{\sigma \downarrow 0} \rho^{\pi_{\mu_\theta, \sigma}}(s) = \rho^{\pi_{\mu_\theta, 0}}(s)$  and the convergence is uniform w.r.t.  $s$ , i.e.

$$\lim_{\sigma \downarrow 0} \sup_s |\rho^{\pi_{\mu_\theta, \sigma}}(s) - \rho^{\pi_{\mu_\theta, 0}}(s)| = 0 \quad (5)$$

*Proof.* We have that  $\rho^\pi(s) = \sum_{t=1}^{\infty} \gamma^{t-1} p_t^\pi(s)$ . Clearly  $p_1^{\pi_{\mu_\theta, \sigma}}(s) = p_1(s) = p_1^{\pi_{\mu_\theta, 0}}(s)$ . Note that by the definition of  $\nu_\sigma$ , given any  $\epsilon_1 > 0$  we can choose  $\sigma^*$  such that for all  $\sigma < \sigma^*$ ,

$$\sup_s \left| \int \pi_{\mu_\theta, \sigma}(a|s) p(s'|s, a) da - \int \pi_{\mu_\theta, 0}(a|s) p(s'|s, a) da \right| \leq \epsilon_1.$$

Now suppose (for induction) that for some  $t \geq 1$  we have that

$$\sup_s |p_t^{\pi_{\mu_\theta, \sigma}}(s) - p_t^{\pi_{\mu_\theta, 0}}(s)| \leq \epsilon_2(t),$$

then,

$$\begin{aligned} \sup_{s'} \left| p_{t+1}^{\pi_{\mu_\theta, \sigma}}(s') - p_{t+1}^{\pi_{\mu_\theta, 0}}(s') \right| &\leq \sup_{s'} \int |p_t^{\pi_{\mu_\theta, \sigma}}(s) - p_t^{\pi_{\mu_\theta, 0}}(s)| \int \pi_{\mu_\theta, \sigma}(a|s) p(s'|s, a) da ds \\ &+ \sup_{s'} \int p_t^{\pi_{\mu_\theta, 0}}(s) \left| \int \pi_{\mu_\theta, \sigma}(a|s) p(s'|s, a) da - \int \pi_{\mu_\theta, 0}(a|s) p(s'|s, a) da \right| ds \\ &\leq \epsilon_2(t) \int b ds + \epsilon_1 \\ &= \epsilon_2(t) b \zeta + \epsilon_1, \end{aligned}$$

where  $\zeta = \int 1 ds < \infty$ . Since  $\epsilon_2(1) = 0$  we therefore have that

$$\sup_s |p_t^{\pi_{\mu_\theta, \sigma}}(s) - p_t^{\pi_{\mu_\theta, 0}}(s)| \leq \epsilon_1 (b\zeta + 1)^{t-1},$$

And now given any  $\epsilon > 0$  if we choose  $T$  sufficiently large such that,  $\sum_{t=T+1}^{\infty} \gamma^{t-1} b < \epsilon/2$  and then we choose  $\epsilon_1$  and the corresponding  $\sigma^*$  sufficiently small so that,  $\sum_{t=1}^T \gamma^{t-1} \epsilon_1 (b\zeta + 1)^{t-1} < \epsilon/2$ , then we ensure that for any  $\sigma < \sigma^*$ ,

$$\begin{aligned} \sup_s |\rho^{\pi_{\mu_{\theta}, \sigma}}(s) - \rho^{\pi_{\mu_{\theta}, 0}}(s)| &= \sup_s \left| \sum_{t=1}^{\infty} \gamma^{t-1} p_t^{\pi_{\mu_{\theta}, \sigma}}(s) - \sum_{t=1}^{\infty} \gamma^{t-1} p_t^{\pi_{\mu_{\theta}, 0}}(s) \right| \\ &\leq \sum_{t=1}^T \gamma^{t-1} \sup_s |p_t^{\pi_{\mu_{\theta}, \sigma}}(s) - p_t^{\pi_{\mu_{\theta}, 0}}(s)| \\ &\quad + \sum_{t=T+1}^{\infty} \gamma^{t-1} \sup_s |p_t^{\pi_{\mu_{\theta}, \sigma}}(s) - p_t^{\pi_{\mu_{\theta}, 0}}(s)| \\ &\leq \sum_{t=1}^T \gamma^{t-1} \epsilon_1 (b\zeta + 1)^{t-1} + \sum_{t=1}^{\infty} \gamma^{t-1} b \\ &\leq \epsilon \end{aligned}$$

as required.  $\square$

**Lemma 4.** For all  $s \in \mathcal{S}$ ,  $\theta$ , the convergence  $\nabla_a Q^{\pi_{\mu_{\theta}, \sigma}}(a, s) \rightarrow \nabla_a Q^{\pi_{\mu_{\theta}, 0}}(a, s)$ , as  $\sigma \rightarrow 0$ , is uniform in  $(s, a)$ , i.e.

$$\limsup_{\sigma \downarrow 0} \sup_{(s, a)} \|\nabla_a Q^{\pi_{\mu_{\theta}, \sigma}}(a, s) - \nabla_a Q^{\pi_{\mu_{\theta}, 0}}(a, s)\| = 0$$

*Proof.*  $\nabla_a Q^{\pi}(a, s) = \nabla_a (r(s, a) + \gamma \int p(s'|s, a) V^{\pi}(s') ds')$ , so

$$\begin{aligned} \sup_{(s, a)} \|\nabla_a Q^{\pi_{\mu_{\theta}, \sigma}}(a, s) - \nabla_a Q^{\pi_{\mu_{\theta}, 0}}(a, s)\| &\leq \gamma \int \sup_{(s', s, a)} \|\nabla_a p(s'|s, a)\| |V^{\pi_{\mu_{\theta}, \sigma}}(s') - V^{\pi_{\mu_{\theta}, 0}}(s')| ds' \\ &\leq \gamma \zeta L \sup_{s'} |V^{\pi_{\mu_{\theta}, \sigma}}(s') - V^{\pi_{\mu_{\theta}, 0}}(s')| \end{aligned}$$

where  $\zeta = \int 1 ds < \infty$ . Now, given any  $\epsilon_1, \epsilon_2$  there exists  $\sigma^*$  such that for all  $\sigma < \sigma^*$  we have that,

$$\sup_s \left| \int r(s, a) (\pi_{\mu_{\theta}, \sigma}(a|s) - \pi_{\mu_{\theta}, 0}(a|s)) da \right| < \epsilon_1$$

and

$$\sup_{s, \hat{s}} |\rho_s^{\pi_{\mu_{\theta}, \sigma}}(s) - \rho_s^{\pi_{\mu_{\theta}, 0}}(s)| < \epsilon_2 \quad (6)$$

where  $\rho_s^{\pi}(s)$  is analogous to  $\rho^{\pi}(s)$ , but conditioned on starting in distribution  $\int p(s|a, \hat{s}) \pi(a|\hat{s}) da$  at  $t = 1$  rather than in distribution  $p_1$  (the result (6) result can be proved in an identical fashion to Lemma 3 noting that the result does not depend upon  $p_1$  other than through its boundedness). Then,

$$\begin{aligned} \sup_{s'} |V^{\pi_{\mu_{\theta}, \sigma}}(s') - V^{\pi_{\mu_{\theta}, 0}}(s')| &\leq \sup_{s'} \left| \int r(s', a) (\pi_{\mu_{\theta}, \sigma}(a|s') - \pi_{\mu_{\theta}, 0}(a|s')) da \right| \\ &\quad + \gamma \sup_{s'} \left| \int \int \rho_{s'}^{\pi_{\mu_{\theta}, \sigma}}(s) \pi_{\mu_{\theta}, \sigma}(a|s) r(s, a) dad s - \int \int \rho_{s'}^{\pi_{\mu_{\theta}, 0}}(s) \pi_{\mu_{\theta}, 0}(a|s) r(s, a) dad s \right| \\ &\leq \epsilon_1 + \sup_{s'} \int \int |\rho_{s'}^{\pi_{\mu_{\theta}, \sigma}}(s) - \rho_{s'}^{\pi_{\mu_{\theta}, 0}}(s)| |r(s, a)| \pi_{\mu_{\theta}, 0}(a|s) dad s \\ &\quad + \left| \sup_{s'} \int \rho_{s'}^{\pi_{\mu_{\theta}, 0}}(s) \int r(s, a) (\pi_{\mu_{\theta}, \sigma}(a|s) - \pi_{\mu_{\theta}, 0}(a|s)) dad s \right| \\ &\leq \epsilon_1 + \epsilon_2 \zeta b + \epsilon_1 / (1 - \gamma) \end{aligned}$$

which can thus be made arbitrarily small by choosing  $\sigma$  sufficiently small.  $\square$

*proof of Theorem 2.* Translation invariance, and Lemma 1 implies that  $\nabla_{a'} \nu_\sigma(a', a)|_{a'=\mu_\theta(s)} = -\nabla_a \nu_\sigma(\mu_\theta(s), a)$ . Then integration by parts implies that,

$$\begin{aligned} \int_{\mathcal{A}} Q^{\pi_{\mu_\theta, \sigma}}(s, a) \nabla_{a'} \nu_\sigma(a', a)|_{a'=\mu_\theta(s)} da &= - \int_{\mathcal{A}} Q^{\pi_{\mu_\theta, \sigma}}(s, a) \nabla_a \nu_\sigma(\mu_\theta(s), a) da \\ &= \int_{\mathcal{C}_{\mu_\theta(s)}} \nabla_a Q^{\pi_{\mu_\theta, \sigma}}(s, a) \nu_\sigma(\mu_\theta(s), a) da + \text{boundary terms} \\ &= \int_{\mathcal{C}_{\mu_\theta(s)}} \nabla_a Q^{\pi_{\mu_\theta, \sigma}}(s, a) \nu_\sigma(\mu_\theta(s), a) da \end{aligned}$$

Where the boundary terms are zero since  $\nu_\sigma$  vanishes on the boundary. We have, from the stochastic policy gradient theorem,

$$\begin{aligned} \lim_{\sigma \downarrow 0} \nabla_\theta J(\pi_{\mu_\theta, \sigma}) &= \lim_{\sigma \downarrow 0} \int_{\mathcal{S}} \rho^{\pi_{\mu_\theta, \sigma}}(s) \int_{\mathcal{A}} Q^{\pi_{\mu_\theta, \sigma}}(s, a) \nabla_\theta \pi_{\mu_\theta, \sigma}(a|s) d\mathbf{a} ds \\ &= \lim_{\sigma \downarrow 0} \int_{\mathcal{S}} \rho^{\pi_{\mu_\theta, \sigma}}(s) \int_{\mathcal{A}} Q^{\pi_{\mu_\theta, \sigma}}(s, a) \nabla_\theta \mu_\theta(s) \nabla_{a'} \nu_\sigma(a', a)|_{a'=\mu_\theta(s)} d\mathbf{a} ds \\ &= \lim_{\sigma \downarrow 0} \int_{\mathcal{S}} \rho^{\pi_{\mu_\theta, \sigma}}(s) \nabla_\theta \mu_\theta(s) \int_{\mathcal{C}_{\mu_\theta(s)}} \nabla_a Q^{\pi_{\mu_\theta, \sigma}}(s, a) \nu_\sigma(\mu_\theta(s), a) d\mathbf{a} ds \\ &= \int_{\mathcal{S}} \lim_{\sigma \downarrow 0} \rho^{\pi_{\mu_\theta, \sigma}}(s) \nabla_\theta \mu_\theta(s) \int_{\mathcal{C}_{\mu_\theta(s)}} \nabla_a Q^{\pi_{\mu_\theta, \sigma}}(s, a) \nu_\sigma(\mu_\theta(s), a) d\mathbf{a} ds, \end{aligned} \quad (7)$$

where exchange of limit and integral in (7) follows by dominated convergence (in Banach spaces) where we can take the dominating function (which is bounded by Lemma 2),

$$\begin{aligned} g_\theta(s) &= \sup_{\sigma} \{ \rho^{\pi_{\mu_\theta, \sigma}}(s) \} \sup_{a \in \mathcal{C}_{\mu_\theta(s), \sigma}} \{ \| \nabla_a Q^{\pi_{\mu_\theta, \sigma}}(a, s) \| \} \| \nabla_\theta \mu_\theta(s) \|_{\text{op}} \\ &\geq \| \rho^{\pi_{\mu_\theta, \sigma}}(s) \int_{\mathcal{C}_{\mu_\theta(s)}} \nabla_a Q^{\pi_{\mu_\theta, \sigma}}(s, a) \nu_\sigma(\mu_\theta(s), a) da \nabla_\theta \mu_\theta(s) \|. \end{aligned} \quad (8)$$

Where  $\| \cdot \|_{\text{op}}$  denotes the operator norm, or largest singular value. Now note that by uniform convergence of  $\nabla_a Q^{\pi_{\mu_\theta, \sigma}}(s, a)$ , Lemma 4, given any  $\epsilon_1, \epsilon_2$  there exists  $\sigma^*$  such that for all  $\sigma < \sigma^*$  we have

$$\| \nabla_a Q^{\pi_{\mu_\theta, \sigma}}(s, a) - \nabla_a Q^{\pi_{\mu_\theta, 0}}(s, a) \| < \epsilon_1$$

so that

$$\| \int_{\mathcal{C}_{\mu_\theta(s)}} \nabla_a Q^{\pi_{\mu_\theta, \sigma}}(s, a) \nu_\sigma(\mu_\theta(s), a) da - \int_{\mathcal{C}_{\mu_\theta(s)}} \nabla_a Q^{\pi_{\mu_\theta, 0}}(s, a) \nu_\sigma(\mu_\theta(s), a) da \| < \epsilon_1,$$

and also that,

$$\| \int_{\mathcal{C}_{\mu_\theta(s)}} \nabla_a Q^{\pi_{\mu_\theta, 0}}(s, a) \nu_\sigma(\mu_\theta(s), a) da - \nabla_a Q^{\pi_{\mu_\theta, 0}}(s, a)|_{a=\mu_\theta(s)} \| < \epsilon_2.$$

Hence,

$$\| \int_{\mathcal{C}_{\mu_\theta(s)}} \nabla_a Q^{\pi_{\mu_\theta, \sigma}}(s, a) \nu_\sigma(\mu_\theta(s), a) da - \nabla_a Q^{\pi_{\mu_\theta, 0}}(s, a)|_{a=\mu_\theta(s)} \| < \epsilon_1 + \epsilon_2$$

and from this and Lemma 3 we have,

$$\begin{aligned} (7) &= \int_{\mathcal{S}} \rho^{\pi_{\mu_\theta, 0}}(s) \nabla_\theta \mu_\theta(s) \lim_{\sigma \downarrow 0} \int_{\mathcal{C}_{\mu_\theta(s)}} \nabla_a Q^{\pi_{\mu_\theta, \sigma}}(s, a) \nu_\sigma(\mu_\theta(s), a) d\mathbf{a} ds \\ &= \int_{\mathcal{S}} \rho^{\pi_{\mu_\theta, 0}}(s) \nabla_\theta \mu_\theta(s) \nabla_a Q^{\pi_{\mu_\theta, 0}}(s, a)|_{a=\mu_\theta(s)} ds \\ &= \int_{\mathcal{S}} \rho^{\mu_\theta}(s) \nabla_\theta \mu_\theta(s) \nabla_a Q^{\mu_\theta}(s, a)|_{a=\mu_\theta(s)} ds \end{aligned}$$

□
